# Supplementary material
Source: PubMed Central journal article supplement (PMC6689534)
Supplement: NIHMS1011216-supplement-2.pdf [file NIHMS1011216-supplement-2.pdf]

**Table S1 Clinical information of the subjects**

| Subject # | Age | Gender | Diagnosis <sup>1</sup>   | Experiments <sup>2</sup> |
|-----------|-----|--------|--------------------------|--------------------------|
| 1         | 42  | M      | Colorectal cancer        | (2); (3)                 |
| 2         | 35  | F      | Hepatocellular carcinoma | (2); (3); (4); (5)       |
| 3         | 46  | F      | Breast cancer            | (2); (3); (4)            |
| 4         | 56  | F      | Colorectal cancer        | (1); (4)                 |
| 5         | 54  | F      | Renal cell carcinoma     | (1)                      |
| 6         | 64  | M      | Colorectal cancer        | (1)                      |
| 7         | 59  | F      | Colorectal cancer        | (4)                      |
| 8         | 53  | F      | Colorectal cancer        | (5)                      |
| 9         | 67  | F      | Mullerian tumor          | (5)                      |
| 10        | 36  | M      | Cholangiocarcinoma       | (5)                      |
| 11        | 62  | M      | Colorectal cancer        | (5)                      |
| 12        | 41  | F      | Cholangiocarcinoma       | (5)                      |

<sup>1</sup>Diagnosis: Primary or secondary liver cancer (liver metastases) that led to liver resection surgery.

<sup>2</sup>Experiments

(1) MTS assay

(2) Fluidigm assay for cell type specific genes

(3) Fluidigm assay for injury response

(4) Histology

(5) Fluidigm assay for Poly-I:C and LPS treatment response

**Table S2 Kupffer cell-specific gene candidates**

| Enriched Fold Change vs HSC <sup>1</sup> | Enriched Fold Change vs LSEC <sup>1</sup> | Gene    | Annotation                                        |
|------------------------------------------|-------------------------------------------|---------|---------------------------------------------------|
| 314.54                                   | 247.65                                    | FCN1    | ficolin (collagen/fibrinogen domain containing) 1 |
| 218.66                                   | 235.59                                    | CX3CR1  | chemokine (C-X3-C motif) receptor 1               |
| 127.59                                   | 120.93                                    | S100A12 | S100 calcium binding protein A12                  |
| 113.13                                   | 262.18                                    | MNDA    | myeloid cell nuclear differentiation antigen      |
| 46.26                                    | 48.66                                     | ITGA4   | integrin alpha 4                                  |
| 38.9                                     | 37.63                                     | CCR2    | chemokine (C-C motif) receptor 2                  |

Enriched fold change<sup>1</sup> is the average of the fold changes obtained in three patient samples.

**Table S3 LSEC-specific gene candidates**

| Enriched Fold Change vs KC <sup>1</sup> | Enriched Fold Change vs HSC <sup>1</sup> | Gene   | Annotation                             |
|-----------------------------------------|------------------------------------------|--------|----------------------------------------|
| 121.19                                  | 124.47                                   | EMCN   | endomucin                              |
| 103.31                                  | 112                                      | VWF    | von Willebrand factor                  |
| 88.49                                   | 99.4                                     | ADGRL4 | adhesion G protein-coupled receptor L4 |
| 49.03                                   | 66.76                                    | TEK    | TEK tyrosine kinase, endothelial       |

|       |        |        |                                   |
|-------|--------|--------|-----------------------------------|
| 41.01 | 107.74 | CALCRL | calcitonin receptor like receptor |
| 11.96 | 12.06  | CD34   | CD34 molecule                     |

---

Enriched fold change<sup>1</sup> is the average of the fold changes obtained in three patient samples.

**Table S4 HSC-specific gene candidates**

| Enriched Fold Change vs KC <sup>1</sup> | Enriched Fold Change vs LSEC <sup>1</sup> | Gene   | Annotation                                            |
|-----------------------------------------|-------------------------------------------|--------|-------------------------------------------------------|
| 120.92                                  | 148.93                                    | APOB   | apolipoprotein B                                      |
| 92.78                                   | 63.53                                     | UGT2B7 | UDP glucuronosyltransferase 2 family, polypeptide B7  |
| 67.28                                   | 44.69                                     | PAH    | phenylalanine hydroxylase                             |
| 37.54                                   | 40.09                                     | CYP3A5 | cytochrome P450, family 3, subfamily A, polypeptide 5 |
| 83.62                                   | 31.49                                     | IGFBP1 | insulin like growth factor binding protein 1          |
| 46.29                                   | 27.44                                     | FGFR2  | fibroblast growth factor receptor 2                   |
| 20.65                                   | 19.35                                     | AFM    | afamin                                                |

---

Enriched fold change<sup>1</sup> is the average of the fold changes obtained in three patient samples.
